# Supplementary material for: The construction of resveratrol-loaded protein–polysaccharide–tea saponin complex nanoparticles for controlling physicochemical stability and in vitro digestion
Source: Royal Society of Chemistry journal article supplement (doi:10.1039/d0fo01741h), 2020-01-01
Supplement: d0fo01741h1.pdf [file d0fo01741h1.pdf]

***Supplementary Material***

***The construction of resveratrol loaded protein-polysaccharide-tea saponin complex nanoparticles for controlling the physicochemical stability and in vitro digestion***

*Yang Wei<sup>a,b</sup>, Chang Li<sup>a</sup>, Lei Dai<sup>a</sup>, Liang Zhang<sup>a</sup>, Jinfang Liu<sup>a</sup>, Like Mao<sup>a</sup>, Fang Yuan<sup>a</sup>,*

*Yanxiang Gao<sup>a\*</sup>*

*<sup>a</sup>Beijing Advanced Innovation Center for Food Nutrition and Human Health,  
Beijing Laboratory for Food Quality and Safety, Beijing Key Laboratory of  
Functional Food from Plant Resources, College of Food Science & Nutritional  
Engineering, China Agricultural University, Beijing, 100083, P. R. China*

*<sup>b</sup>Food Colloids and Processing Group, School of Food Science and Nutrition,  
University of Leeds, Leeds LS2 9JT, UK*

\*Corresponding author.

Tel.: + 86-10-62737034

Fax: + 86-10-62737986

Address: Box 112, No.17 Qinghua East Road, Haidian District, Beijing 100083,  
China

E-mail: [gyxcau@126.com](mailto:gyxcau@126.com)

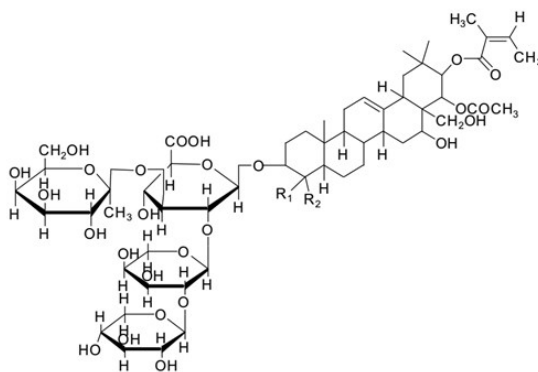

Fig. S1 Molecular structure of tea saponin.

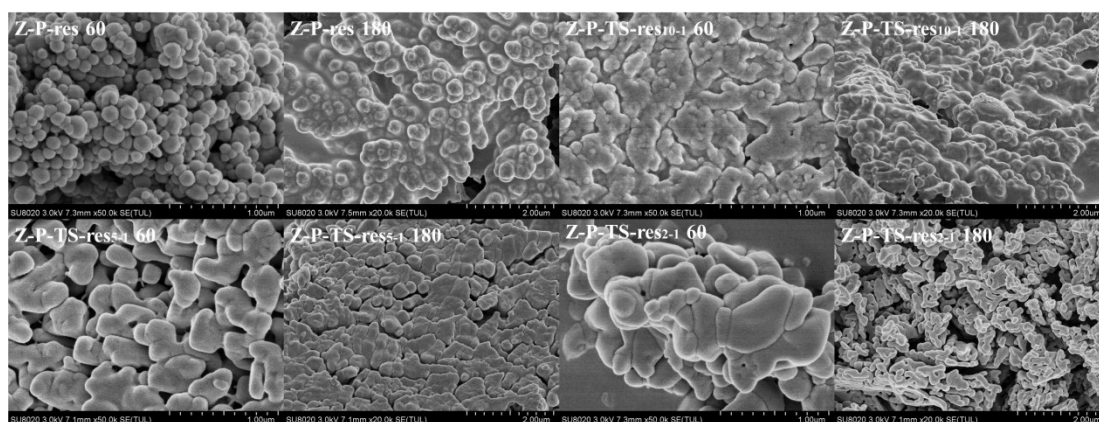

Fig. S2 SEM images of resveratrol loaded zein-PGA-TS ternary complex particles with different levels of TS after in vitro digestion at 60 and 180 min.
